# Supplementary material for: Structural modeling, in vitro antiproliferative activity, and the effect of substituents on the DNA fastening and scission actions of heteroleptic copper(ii) complexes with terpyridines and naproxen
Source: Royal Society of Chemistry journal article supplement (doi:10.1039/c5nj01059d), 2015-01-01
Supplement: c5nj01059d1.pdf [file c5nj01059d1.pdf]

## SUPPLEMENTARY INFORMATION

### **STRUCTURAL MODELING, *IN VITRO* ANTIPROLIFERATIVE ACTIVITY AND EFFECT OF SUBSTITUENTS ON DNA FASTENING AND SCISSION ACTIONS OF HETEROLEPTIC COPPER(II) COMPLEXES WITH TERPYRIDINES AND NAPROXEN DRUG**

**Dharmasivam Mahendiran<sup>a</sup>, Perumal Gurumoorthy<sup>a</sup>, Krishnasamy Gunasekaran<sup>b</sup>,  
Raju Senthil Kumar<sup>c</sup>, Aziz Kalilur Rahiman<sup>a\*</sup>**

*<sup>a</sup>Post-Graduate and Research Department of Chemistry, The New College (Autonomous),  
Chennai-600 014, India*

*<sup>b</sup>CAS in Crystallograph and Bioinformatics, University of Madras, Guindy Campus,  
Chennai-600 025, India*

*<sup>c</sup>Department of Pharmaceutical Chemistry, Swami Vivekanandha College of Pharmacy,  
Elayampalayam, Tiruchengodu-637 205, India*

---

#### **1. Frontier molecular orbital properties of complexes 1 and 6**

For complex **1**, the first five HOMOs (from HOMO to HOMO–4) show main contributions from the Cu(II) center and minor percentage from terpyridine and naproxen ligands. As shown in **Fig. S4**, the three highest HOMOs (HOMO, HOMO–2, and HOMO–3) correspond to  $t_{2g}$  (Cu) orbitals ( $d_{xy}$ ,  $d_{xz}$ , and  $d_{yz}$ ), while HOMO–1 and HOMO–4 correspond to  $e_g$  (Cu) orbitals ( $d_{x^2-y^2}$  and  $d_{z^2}$ ). Obviously, the degeneracy of the five (Cu) d orbitals is distorted in **1** rather than the idealized degeneracies of three  $t_{2g}$  and two  $e_g$  levels. The longest wavelength bands at 563.6 and 553.5 nm can be attributed to the transitions of  $d \rightarrow d$  character, and moderately intense band appeared at 411.9 nm is assigned to ligand-metal charge transfer ( $\pi(\text{nap}) \rightarrow d/\pi^*(\text{tppy})$ ) transitions, whereas the 274.3 and 239.3 nm mainly from the ligand–ligand charge transfer and inter–ligand (IL) transitions ( $\pi(\text{nap}) \rightarrow \pi^*(\text{tppy})/\pi^*(\text{nap})$ ) (**Table S2**).

The first six lowest LUMOs of complex **1** (from LUMO to LUMO+5), due to the symmetrical character of the structure (**Fig. S4**), fall in three sets of orbitals with same energy level, LUMO/LUMO+1, LUMO+2/LUMO+3, and LUMO+4/LUMO+5. LUMO to

LUMO+3 show main contributions from the Cu(II) center and minor percentage of contribution from terpyridine ligands, but LUMO+4 and LUMO+5 show main contributions from the terpyridine and minor percentage from naproxen ligand. The LUMO/LUMO+1 orbitals, lying  $-1.72$  eV, and other set of energy level LUMO+2/LUMO+3 and LUMO+4/LUMO+5, are calculated to be  $-0.89$  and  $-0.56$  eV higher in energy than that of LUMO/LUMO+1.

In case of complex **6**, the HOMO is constituted 43%  $L^6$ , 12% naproxen and 42% copper characteristics, and the LUMO has 96% contribution from  $L^6$ . So, the HOMO to LUMO transition may be assigned to the admixture of naproxen $\rightarrow$ terpyridine and Cu( $d\pi$ )  $\rightarrow$ L( $\pi^*$ ). Based on these observations, the terpyridine ligands play significant role in the virtual frontier and in the lower occupied molecular orbitals in both complexes.

**Table S1 B3LYP/6-31G(d) Bond Lengths (Å) and Bond Angles (°) of complexes 1, 2, 5 and 6**

| Complexes        | Calculated |        |        |        | Experimental |           |
|------------------|------------|--------|--------|--------|--------------|-----------|
|                  | 1          | 2      | 5      | 6      | 1            | 6         |
| bond length Å    |            |        |        |        |              |           |
| N(1)-Cu(1)       | 2.0231     | 2.0298 | 2.0389 | 2.0353 | 2.087(10)    | 2.033(6)  |
| N(2)-Cu(1)       | 1.9290     | 1.9311 | 1.9210 | 1.9365 | 1.939(10)    | 1.949(6)  |
| N(3)-Cu(1)       | 2.0198     | 2.0443 | 2.0361 | 2.0291 | 2.080(10)    | 2.059(6)  |
| O(1)-Cu(1)       | 1.9274     | 1.9432 | 1.9343 | 1.9201 | 1.948(10)    | 1.921(5)  |
| O(2)-Cu(1)       | 2.8009     | 2.5391 | 2.6352 | 2.7321 | 2.654(10)    | 2.5824(5) |
| Cu(1)-Cl(1)      | 2.3861     | 2.5900 | 2.556  | 2.456  | 2.427(4)     | 2.518(2)  |
| bond angle (deg) |            |        |        |        |              |           |
| O(2)-Cu(1)-N(2)  | 164.34     | 157.92 | 162.88 | 160.54 | 152.7(4)     | 166.8(2)  |
| O(2)-Cu(1)-N(1)  | 100.18     | 93.40  | 92.76  | 83.08  | 78.7(4)      | 99.4(2)   |
| N(2)-Cu(1)-N(1)  | 80.87      | 90.22  | 88.49  | 80.42  | 98.6(4)      | 79.5(3)   |
| O(2)-Cu(1)-N(3)  | 103.48     | 98.19  | 104.54 | 108.99 | 79.4(4)      | 99.2(2)   |
| N(2)-Cu(1)-N(3)  | 81.12      | 78.69  | 89.73  | 80.73  | 98.8(4)      | 79.0(2)   |
| N(1)-Cu(1)-N(3)  | 150.30     | 145.05 | 151.65 | 148.05 | 157.7(4)     | 156.1(2)  |
| O(2)-Cu(1)-Cl(1) | 112.8      | 105.54 | 98.04  | 97.54  | 110.5(3)     | 96.46(17) |
| N(2)-Cu(1)-Cl(1) | 94.65      | 94.10  | 97.80  | 96.10  | 96.8(3)      | 96.71(18) |
| N(1)-Cu(1)-Cl(1) | 100.02     | 99.87  | 97.19  | 98.34  | 98.2(3)      | 96.80(18) |
| N(3)-Cu(1)-Cl(1) | 97.05      | 91.06  | 90.62  | 94.87  | 93.6(3)      | 95.92(17) |

**Table S2 The energy of experimental absorption bands and the electronic transitions calculated with the TD-DFT method for complex 1**

| The most important orbital excitations | Major contributions                                     | $E$ (eV) | $\lambda$ (nm) (cal) | $f$    | $\lambda$ (nm) (exp) |
|----------------------------------------|---------------------------------------------------------|----------|----------------------|--------|----------------------|
| HOMO $\rightarrow$ LUMO                | d $\rightarrow$ d/ $\pi^*$ (tppy)                       | 2.20     | 563.6                | 0.0012 | 612,                 |
| HOMO $\rightarrow$ LUMO+1              | d $\rightarrow$ d/ $\pi^*$ (tppy)                       | 2.24     | 553.5                | 0.0026 | 562,                 |
| HOMO $\rightarrow$ LUMO+2              | $\pi$ (tppy) $\rightarrow$ $\pi^*$ (tppy) /d            | 3.01     | 411.9                | 0.0043 | 412,                 |
| HOMO-1 $\rightarrow$ LUMO+1            | $\pi$ (nap) $\rightarrow$ $\pi^*$ (tppy) /d             | 3.44     | 360.4                | 0.0096 | 372                  |
| HOMO-2 $\rightarrow$ LUMO              | d $\rightarrow$ $\pi^*$ (tppy)/d                        | 3.73     | 332.4                | 0.0237 | 343                  |
| HOMO-2 $\rightarrow$ LUMO+1            | d $\rightarrow$ $\pi^*$ (tppy)/d                        | 3.77     | 328.9                | 0.0253 |                      |
| HOMO-1 $\rightarrow$ LUMO              | $\pi$ (nap) $\rightarrow$ $\pi^*$ (tppy)/d              | 3.97     | 312.3                | 0.0216 |                      |
| HOMO-4 $\rightarrow$ LUMO              | $\pi$ (nap) $\rightarrow$ $\pi^*$ (tppy)/d              | 4.10     | 302.4                | 0.0514 |                      |
| HOMO-3 $\rightarrow$ LUMO+1            | d $\rightarrow$ $\pi^*$ (tppy) /d                       | 4.10     | 302.4                | 0.0514 |                      |
| HOMO-4 $\rightarrow$ LUMO+1            | $\pi$ (nap) $\rightarrow$ $\pi^*$ (tppy)/d              | 4.14     | 299.5                | 0.0560 |                      |
| HOMO-1 $\rightarrow$ LUMO+3            | $\pi$ (nap) $\rightarrow$ $\pi^*$ (tppy)/d              | 4.31     | 287.7                | 0.0379 |                      |
| HOMO-1 $\rightarrow$ LUMO+4            | $\pi$ (nap) $\rightarrow$ $\pi^*$ (tppy)/ $\pi^*$ (nap) | 4.52     | 274.3                | 0.0712 | 275                  |
| HOMO-3 $\rightarrow$ LUMO              | d $\rightarrow$ $\pi^*$ (tppy)/d                        | 4.60     | 269.5                | 0.0578 |                      |
| HOMO-1 $\rightarrow$ LUMO+5            | $\pi$ (nap) $\rightarrow$ $\pi^*$ (tppy)/ $\pi^*$ (nap) | 4.63     | 267.8                | 0.0884 |                      |
| HOMO-4 $\rightarrow$ LUMO+2            | $\pi$ (nap) $\rightarrow$ $\pi^*$ (tppy)/d              | 4.91     | 252                  | 0.0186 |                      |
| HOMO-2 $\rightarrow$ LOMO+5            | d $\rightarrow$ $\pi^*$ (nap)/ $\pi^*$ (tppy)           | 4.96     | 250                  | 0.0300 |                      |
| HOMO-3 $\rightarrow$ LUMO+4            | d $\rightarrow$ $\pi^*$ (tppy)/ $\pi^*$ (nap)           | 5.18     | 239.3                | 0.0611 |                      |
| HOMO-4 $\rightarrow$ LOMO+5            | $\pi$ (nap) $\rightarrow$ $\pi^*$ (nap)/ $\pi^*$ (tppy) | 5.33     | 232.6                | 0.1512 | 229                  |

$f \rightarrow$  Oscillator strength

**Table S3 Electrochemical parameters for complexes 1–6**

| Complexes | $i_{pc}$ ( $10^{-5}$ A) | $E_{pc}$ (V) |
|-----------|-------------------------|--------------|
| 1         | 2.01                    | -0.765       |
| 2         | 1.53                    | -0.768       |
| 3         | 2.03                    | -0.759       |
| 4         | 1.35                    | -0.751       |
| 5         | 1.76                    | -0.825       |
| 6         | 2.06                    | -0.818       |

**Table S4 Electrochemical parameters for complexes 1–4 in the absence and presence of CT-DNA**

| Complexes | R | $i_{pc}$ ( $10^{-5}$ A) | $E_{pc}$ (V) |
|-----------|---|-------------------------|--------------|
| 1         | 0 | 1.76                    | -0.765       |
|           | 1 | 1.45                    | -0.754       |
| 5         | 0 | 2.01                    | -0.825       |
|           | 1 | 1.23                    | -0.769       |
| 6         | 0 | 2.06                    | -0.818       |
|           | 1 | 1.98                    | -0.786       |

**Table S5 Effect of complexes 1 and 5 on apoptosis of MCF-7 cells by Hoechst dye staining method**

| Drug Treatment    | Apoptosis (%) |
|-------------------|---------------|
| Control           | 7.8 ± 0.81    |
| Complex-1 (25 μM) | 29.6 ± 1.21   |
| Complex-1 (50 μM) | 59.7 ± 1.2    |
| Complex-5 (25 μM) | 37.6 ± 3.48   |
| Complex-5 (50 μM) | 67.3 ± 1.12   |

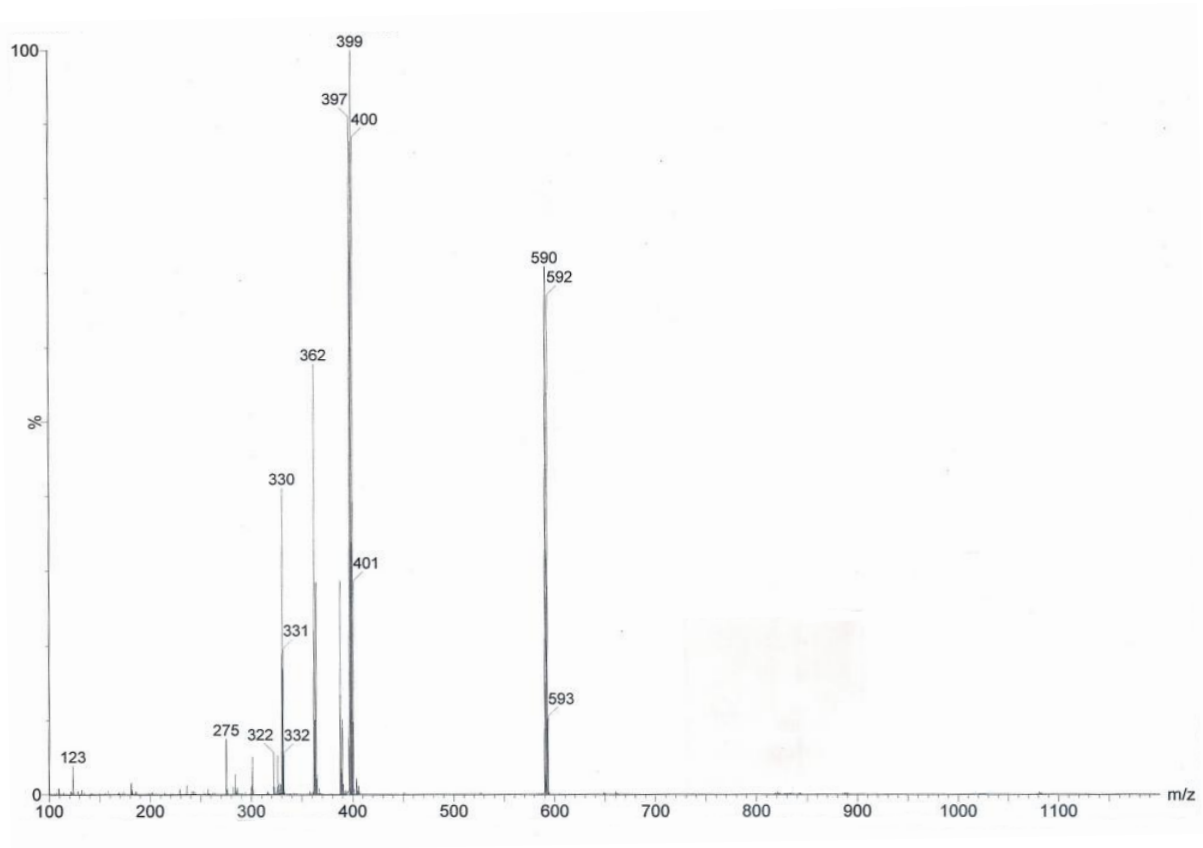

**Fig. S1 ESI mass spectrum of complex 6.**



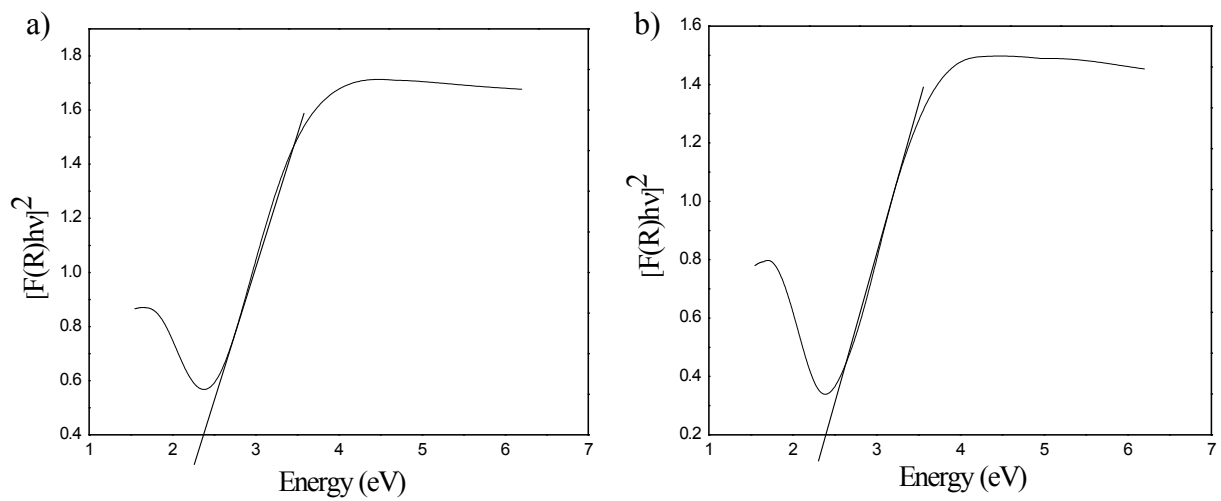

**Fig. S2 Determination of the band-gap energy for complexes 1 (a) and 5 (b) from diffuse reflectance measurements.**

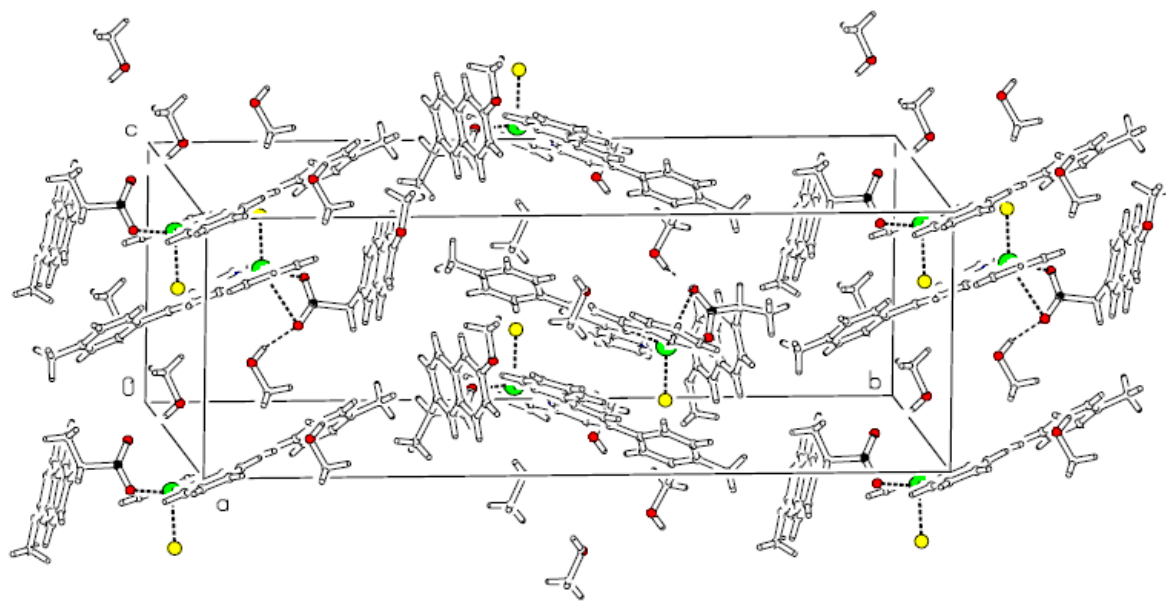

**Fig. S3 Unit cell packing diagram of complex 1.**

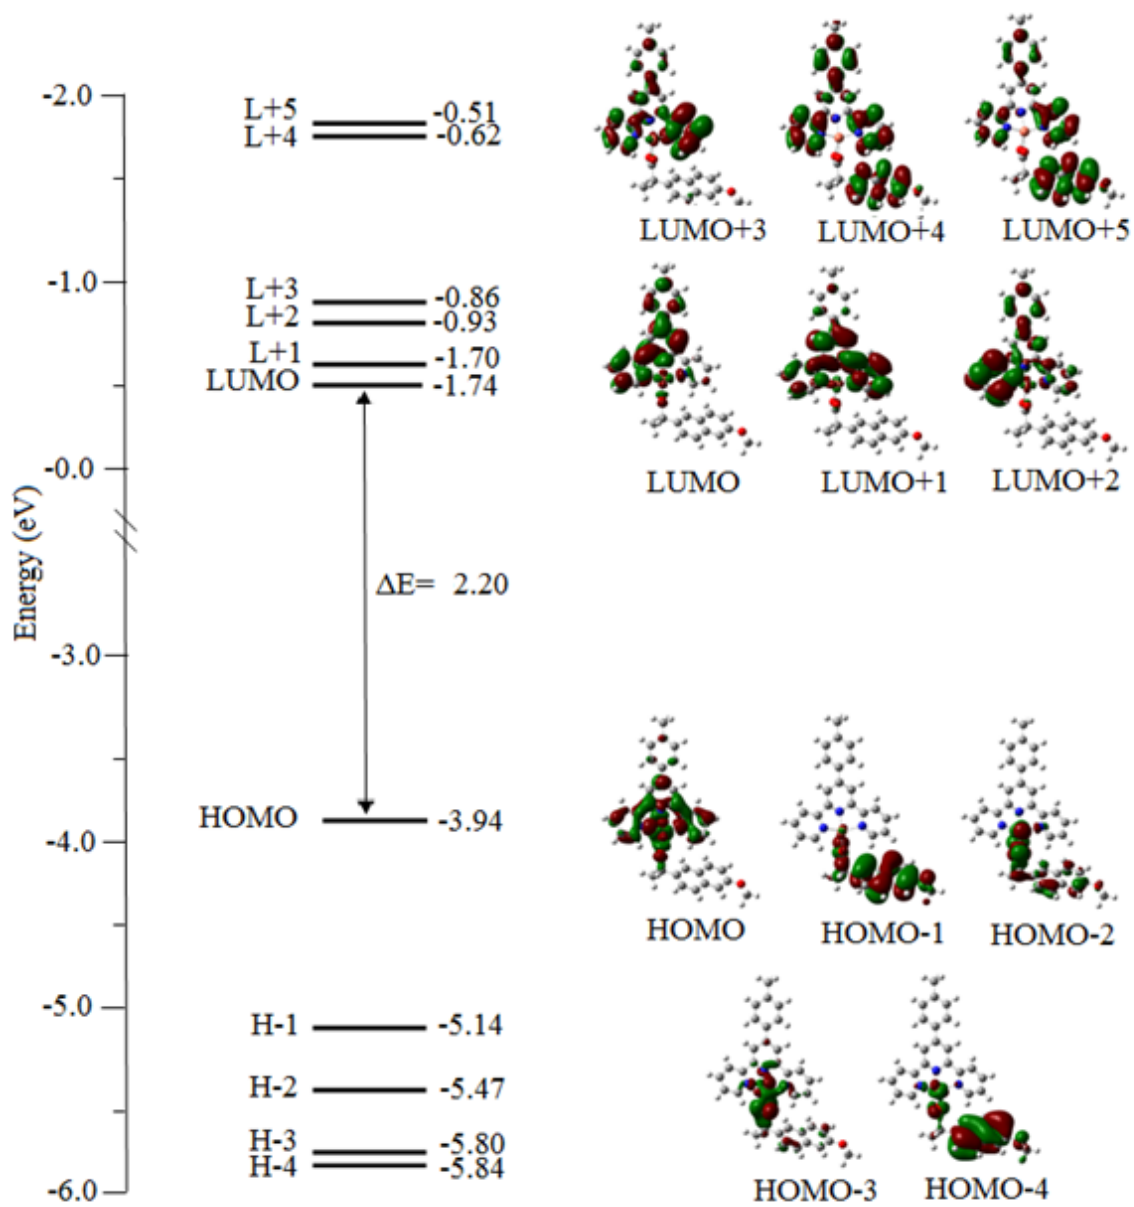

Fig. S4 Frontier MOs of complex 1.

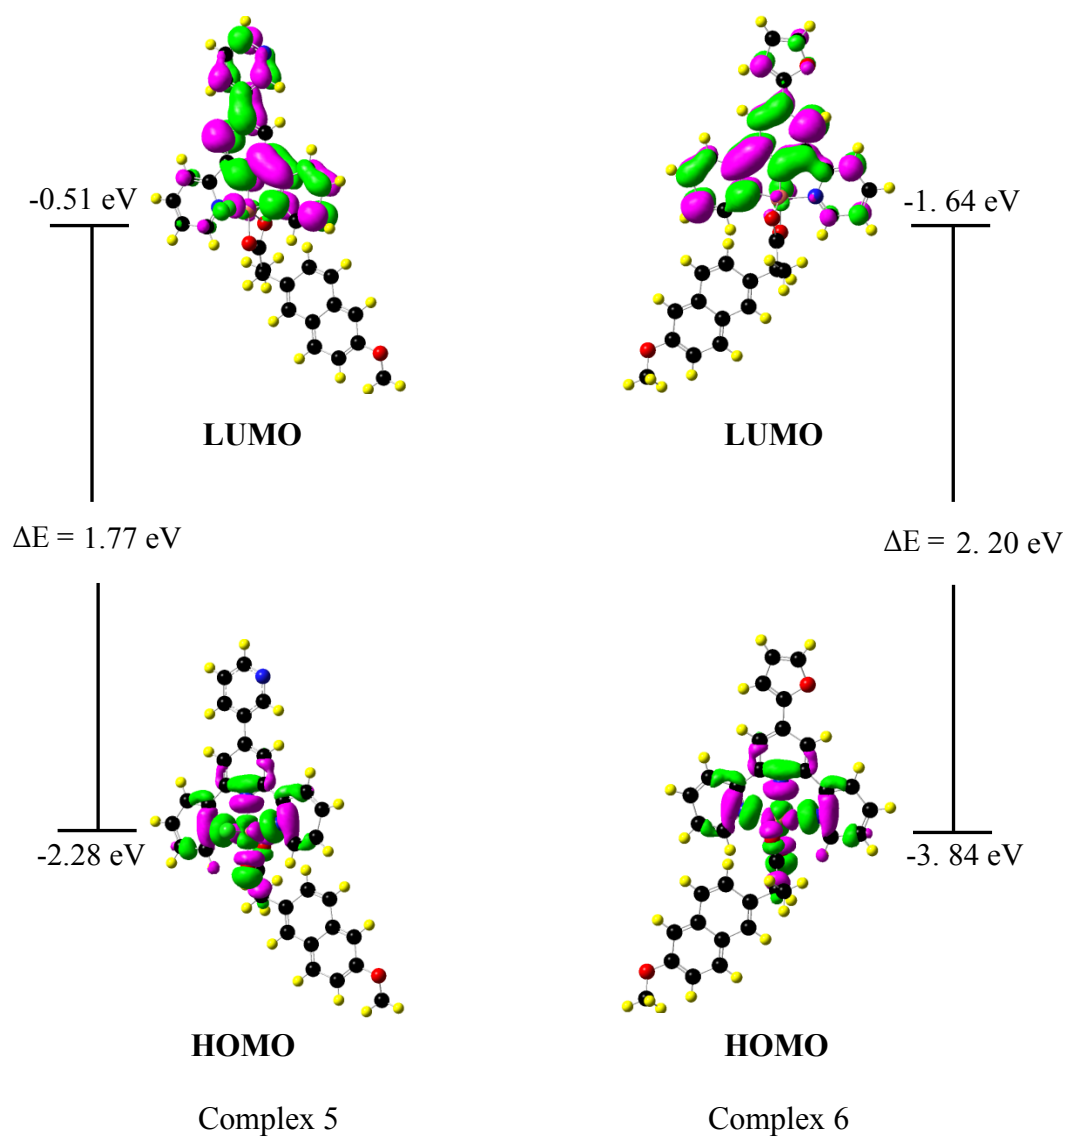

**Fig. S5 Frontier molecular orbital of the complexes 5 and 6.**

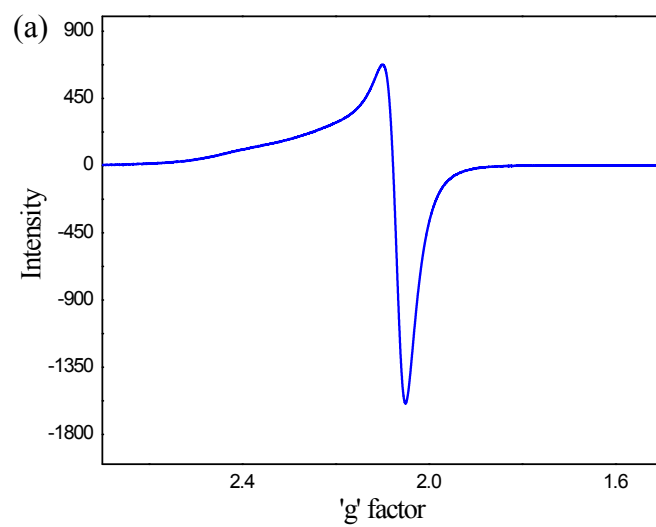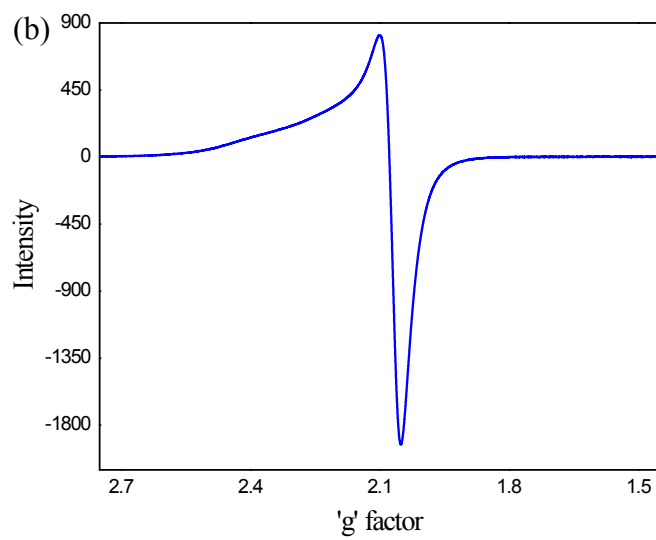

**Fig. S6 Powder X-band EPR spectra of complexes 1 (a) and 6 (b).**

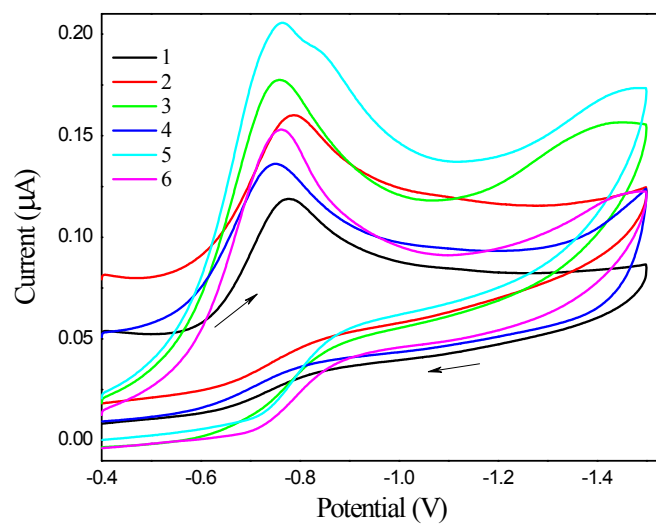

**Fig. S7 Cyclic voltammograms of mixed-ligand copper(II) complexes (1–6) in the cathodic region.**

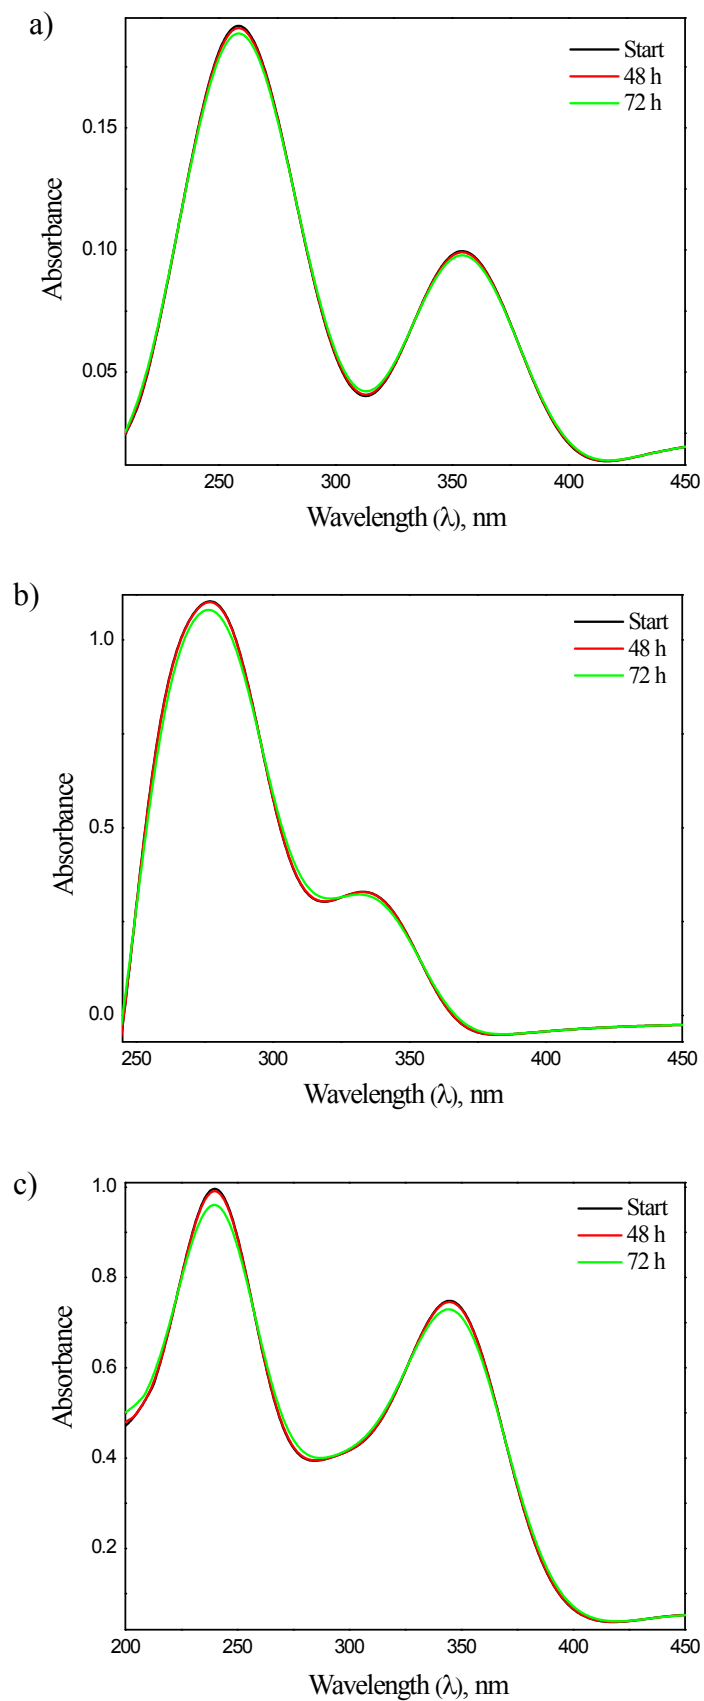

**Fig. S8 Stability of complexes 1 (a), 5 (b) and 6 (c) measured by UV-Vis spectroscopy.**

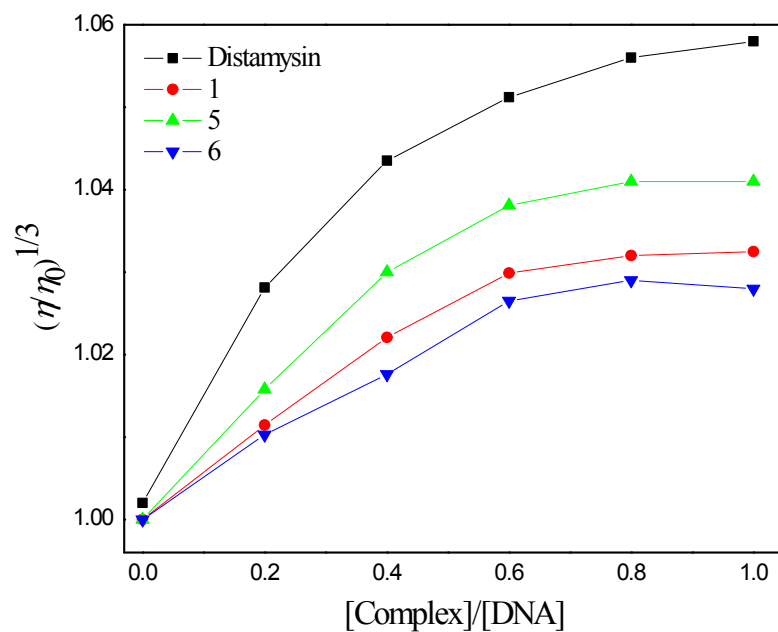

**Fig. S9 Effect of complexes 1, 5 and 6 on the viscosity of CT-DNA. Relative specific viscosity versus  $1/R$  ( $R = [\text{DNA}]/[\text{Complex}]$ ,  $[\text{DNA}] = 200 \mu\text{M}$ ,  $[\text{Complex}] = 10\text{--}100 \mu\text{M}$ ).**



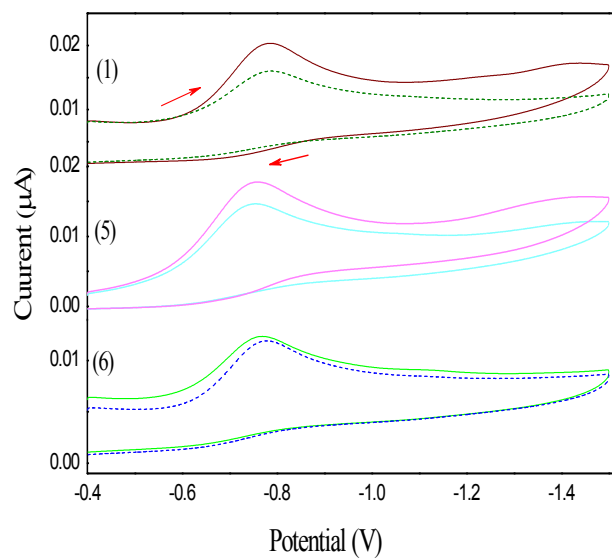

**Fig. S10** Cyclic voltammograms of complexes **1**, **5** and **6** in DMF–Tris–HCl/NaCl buffer at pH 7.3 in the absence (solid line) and presence (dotted line) of CT–DNA and arrow mark indicates the current changes upon increasing DNA concentration.

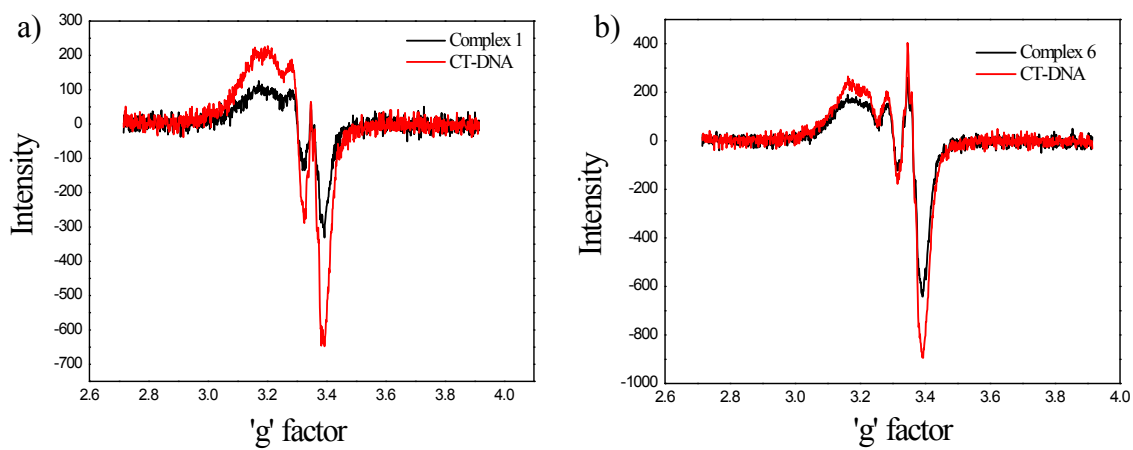

**Fig. S11 EPR spectra of complexes 1 (a) and 6 (b) (25  $\mu\text{M}$ ) after 24 h incubation with CT-DNA (100  $\mu\text{M}$ ) at room temperature.**

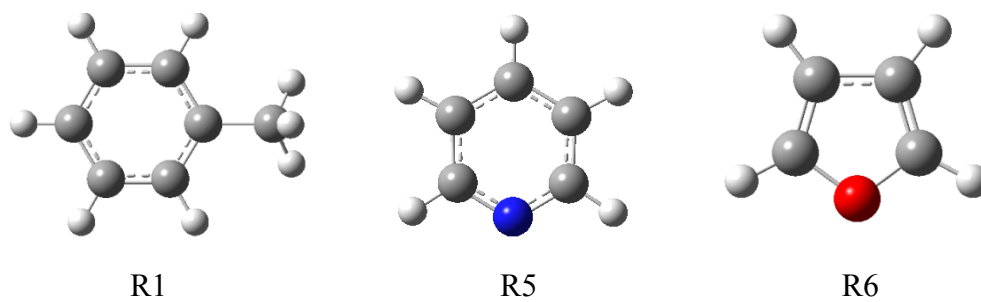

**Fig. S12 Optimized molecular structures of R1 (tolyl), R5 (pyridyl) and R6 (furyl) obtained from Gaussian 03W at the B3LYP/6-31G\* level of calculation.**
